# Supplementary material for: Unique β-Glucuronidase Locus in Gut Microbiomes of Crohn’s Disease Patients and Unaffected First-Degree Relatives
Source: PubMed Central journal article supplement (PMC4732671; doi:10.1371/journal.pone.0148291), 2016-01-29
Supplement: pone.0148291.s003.pdf [file pone.0148291.s003.pdf]

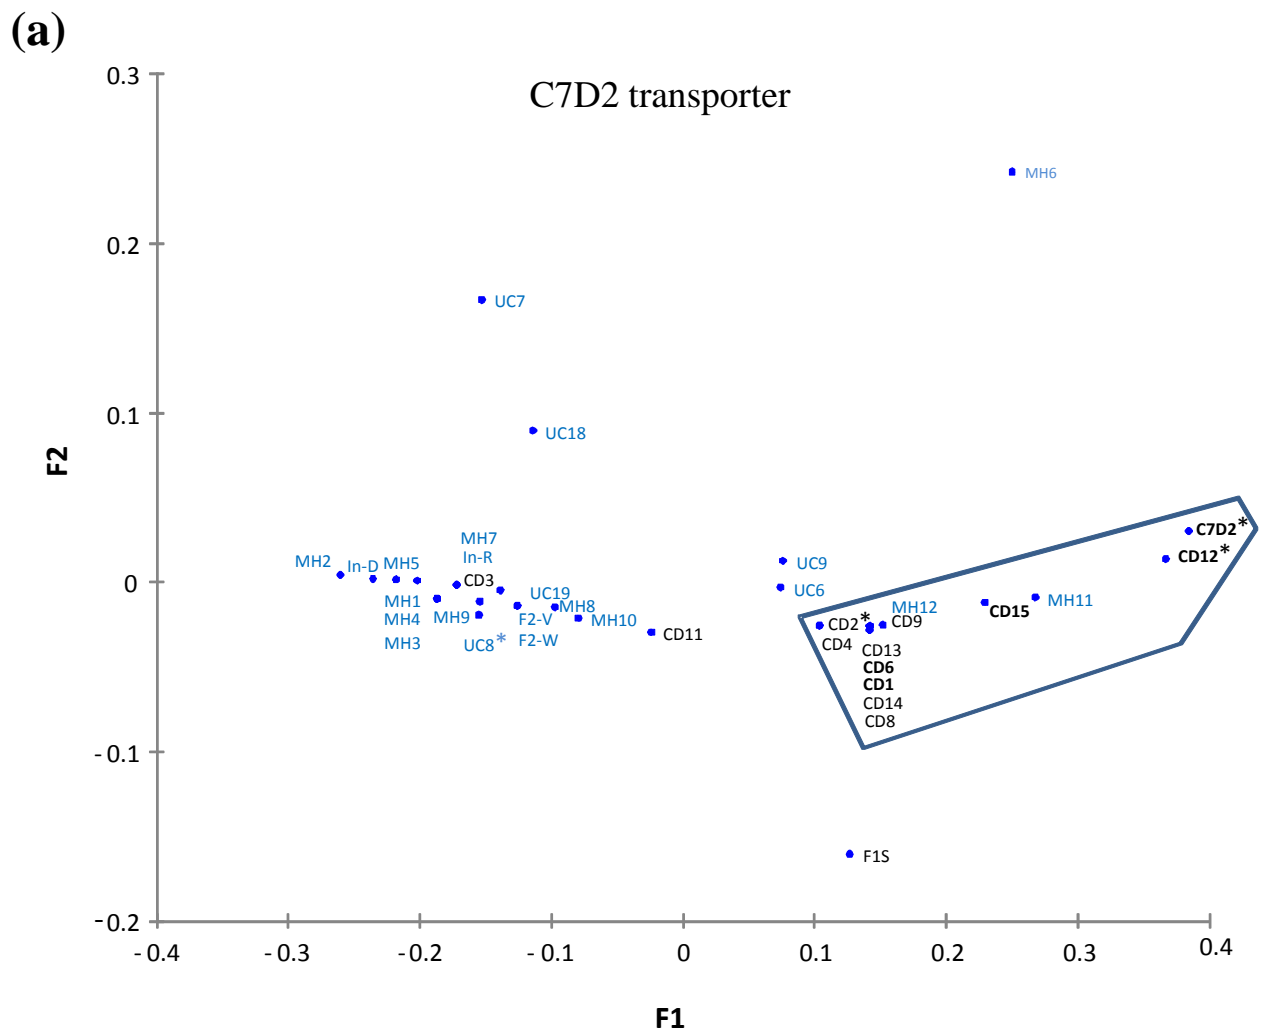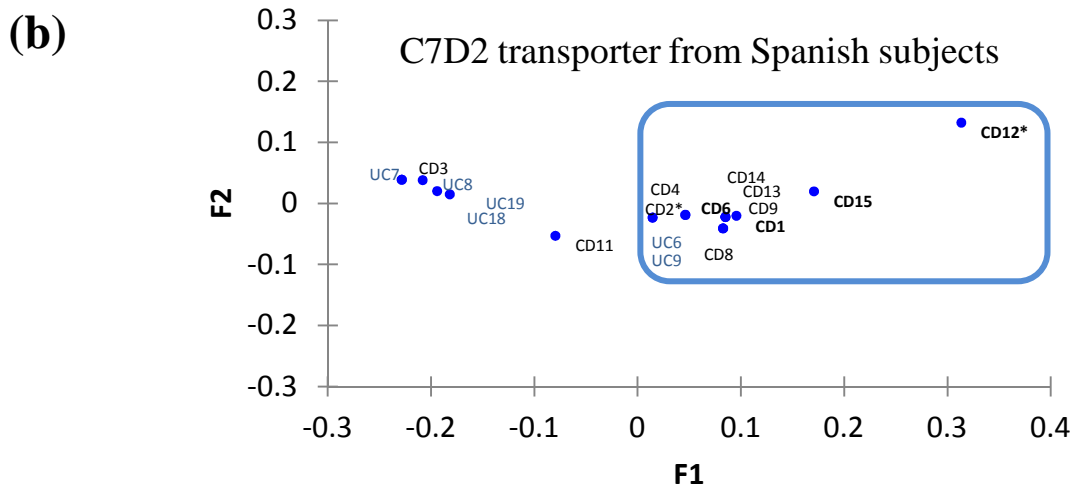

**S3 Figure**
