# Supplementary material for: Unique β-Glucuronidase Locus in Gut Microbiomes of Crohn’s Disease Patients and Unaffected First-Degree Relatives
Source: PubMed Central journal article supplement (PMC4732671; doi:10.1371/journal.pone.0148291), 2016-01-29
Supplement: pone.0148291.s005.pdf [file pone.0148291.s005.pdf]

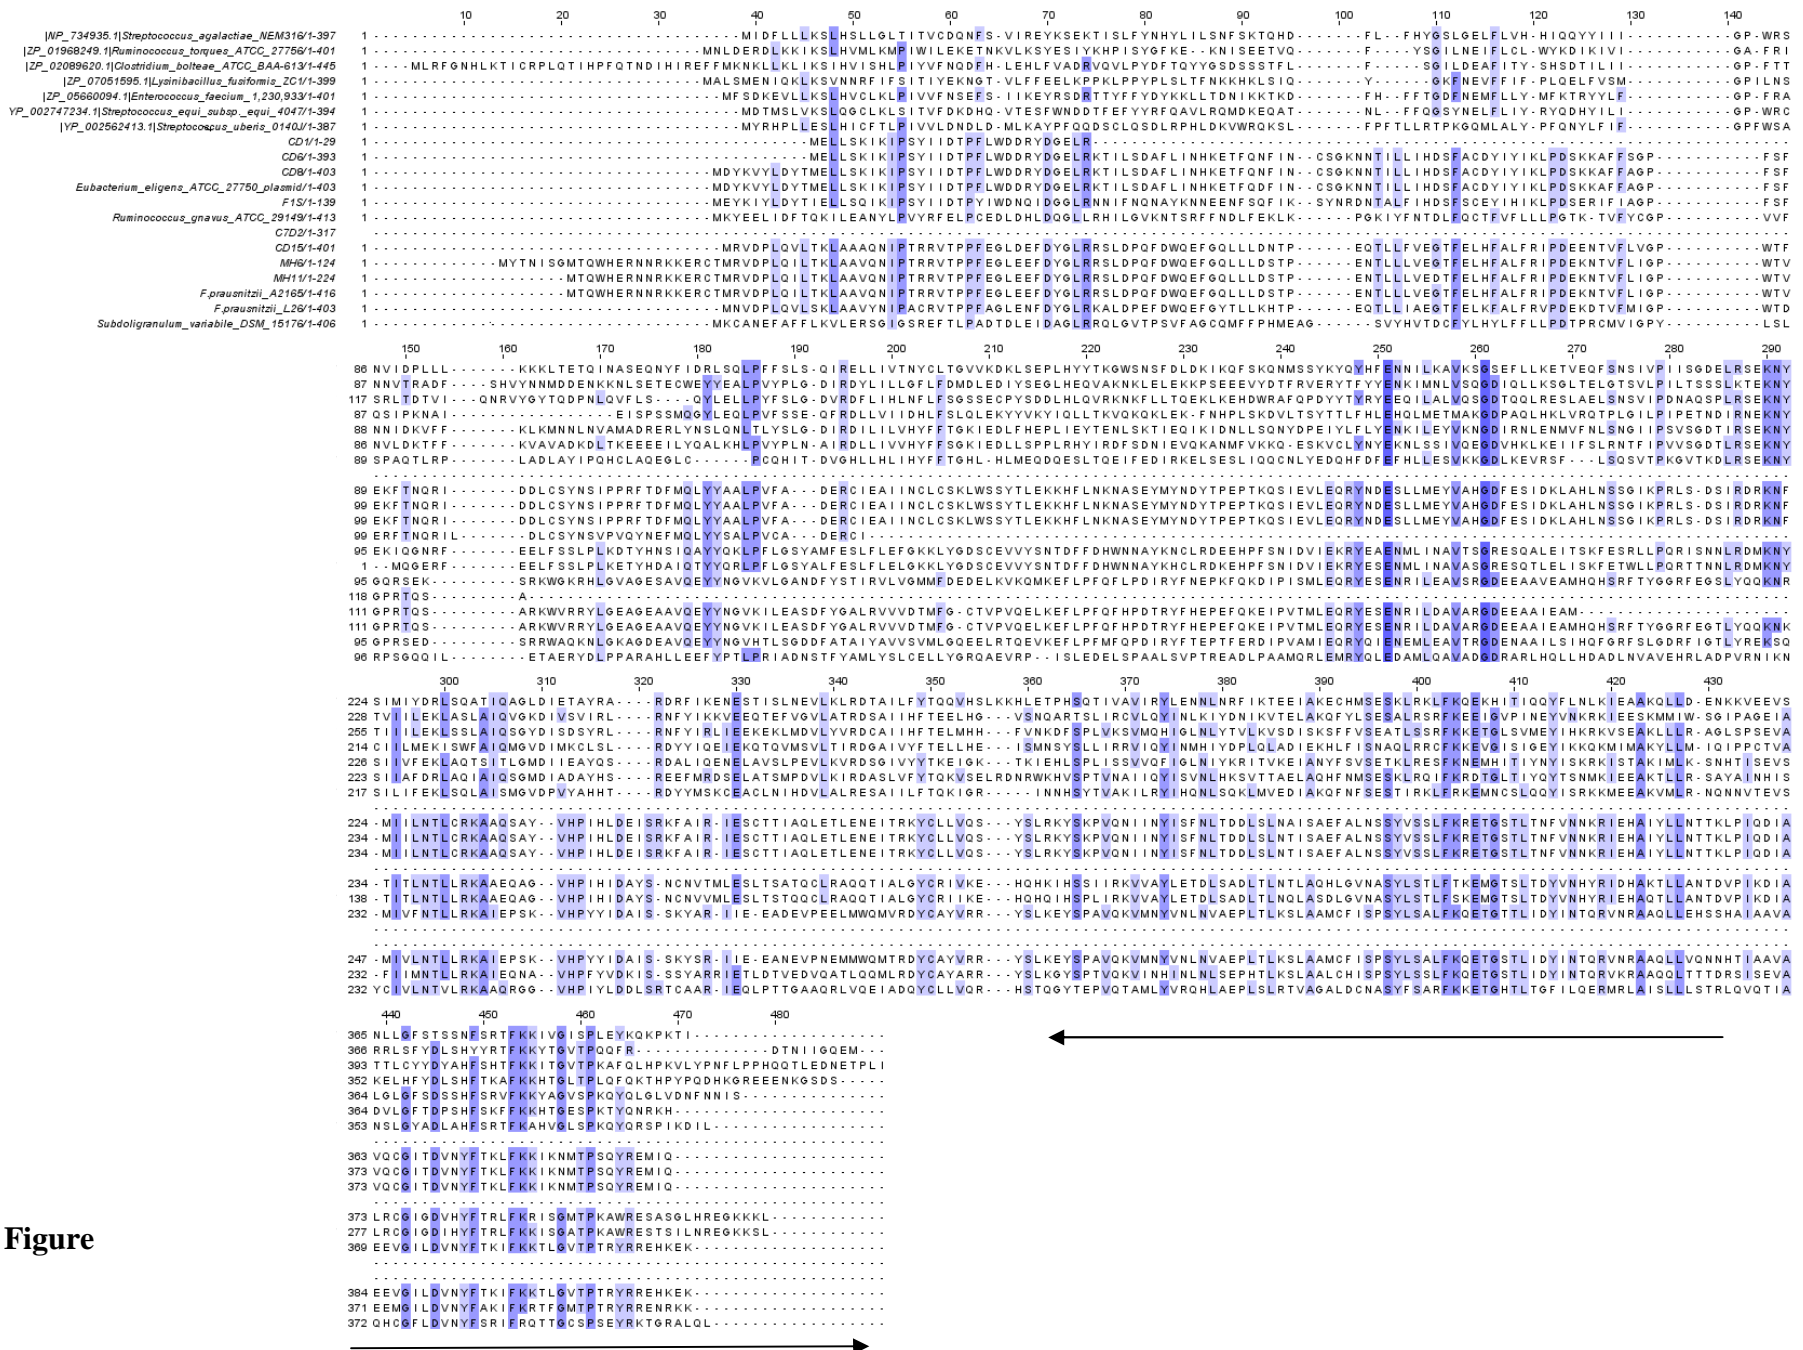

S5 Figure

AraC family DNA-binding domain profile (PS01124 Prosite Pattern)
