# Supplementary material for: Unique β-Glucuronidase Locus in Gut Microbiomes of Crohn’s Disease Patients and Unaffected First-Degree Relatives
Source: PubMed Central journal article supplement (PMC4732671; doi:10.1371/journal.pone.0148291), 2016-01-29
Supplement: pone.0148291.s007.pdf [file pone.0148291.s007.pdf]

T-COFFEE, Version 11.00.8cbe486 (2014-08-12 22:05:29 - Revision 8cbe486 - Build 477)  
 Cedric Notredame  
 CPU TIME:0 sec.  
 SCORE=97

```

*
BAD AVG GOOD
C7D2 CD1 : 98
C7D2 CD4 : 96
C7D2 CD6 : 98
C7D2 CD8 : 98
C7D2 CD9 : 98
C7D2 CD11 : 96
C7D2 CD12 : 97
C7D2 CD13 : 98
C7D2 CD14 : 98
C7D2 CD15 : 97
cons : 9

C7D2 CD1 MT---DNNGKVRPPGKIDKLGYPGDFGNDFTLLSAMFLLEFYTDVVGVSAAALVGLMMAARFVDAIT
C7D2 CD4 MK---NDNIVKPPGFKDKIGYMPGDFGNDLTFLLSSSLMKFYTDVMDVDGVIIVGIMMIAARFIDAFT
C7D2 CD6 MT---DNNGKVRPPGKIDKLGYPGDFGNDFTLLSAMFLLEFYTDVVGVSAAALVGLMMAARFVDAIT
C7D2 CD8 MT---DNNGKVRPPGKIDKLGYPGDFGNDFTLLSAMFLLEFYTDVVGVSAAALVGLMMAARFVDAIT
C7D2 CD9 -----NKGVRFPGKIDKLGYPGDFGNDFTLLSAMFLLEFYTDVVGVSAAALVGLMMAARFVDAIT
C7D2 CD11 ME----TNKTRPFGMRDKIGYLPDFGNDVLIIVSQPLMVFYTDVVGVMKPAVVGTMFLVSRVDAFT
C7D2 CD12 MKMGTNNSTVPAPGMDRLGYPGDFGNDFTLLSAMFLLEFYTDVVGVSAAALVGLMMAARFVDAIT
C7D2 CD13 MT---DNNGKVRPPGKIDKLGYPGDFGNDFTLLSAMFLLEFYTDVVGVSAAALVGLMMAARFVDAIT
C7D2 CD14 MT---DNNGKVRPPGKIDKLGYPGDFGNDFTLLSAMFLLEFYTDVVGVSAAALVGLMMAARFVDAIT
C7D2 CD15 MA---NEMKKAAPFGMKDKVGYMPGDFGNDFTLLSSSLMKFYTDVVGVAALVIGVMMIAARFVDAFT

cons *****

C7D2 CD1 DVTMGOIVDRSRPGKGFAPWLRRCGPFVALASFLMYATWFKDMPMGFKIFWMPFFTYLLWGSICYTGI
C7D2 CD4 DVAMGRICDKSKMTAAAGKFKPWIRRCGPFVAIVSFLMYQSSLSGLPKPAKIAYLFPVTYLLWGSVFFYTI
C7D2 CD6 DVTMGOIVDRSRPGKGFAPWLRRCGPFVALASFLMYATWFKDMPMGFKIFWMPFFTYLLWGSICYTGI
C7D2 CD8 DVTMGOIVDRSRPGKGFAPWLRRCGPFVALASFLMYATWFKDMPMGFKIFWMPFFTYLLWGSICYTGI
C7D2 CD9 DVTMGOIVDRSRPGKGFAPWLRRCGPFVALASFLMYATWFKDMPMGFKIFWMPFFTYLLWGSICYTGI
C7D2 CD11 DITMGRIVDTAPQDKGKFKKIRIMAAPVAIASFLMYQSSFLRDYPMIVKIIVMYITVYLLWGSICYTGI
C7D2 CD12 DVTMGOIVDRSKPTDKGFRPWIKRRCGPFVAIASFLYIQSGLADMPYGVKVAIVMVVYLLWGSIFYTGI
C7D2 CD13 DVTMGOIVDRSRPGKGFAPWLRRCGPFVALASFLMYATWFKDMPMGFKIFWMPFFTYLLWGSICYTGI
C7D2 CD14 DVTMGOIVDRSRPGKGFAPWLRRCGPFVALASFLMYATWFKDMPMGFKIFWMPFFTYLLWGSICYTGI
C7D2 CD15 DVGMGQIVDHSKPNKDKGFRPWIKRRCGPFVAIASFLYIQSGLAGMPYGVKVAIVMVVYLLWGSIFYTGI

cons *****

C7D2 CD1 NIPYGSMAAISDNPTDRSLSNWRTIGATLAOTAI GVVLPLVYVY---DEAGNSVL--SGOKMMLGA
C7D2 CD4 NIPYGSMAAISDNPNDRQSLSTRFTMGGFAGAIIMAVVPLIYLNK---ENGNDAVI--SGAKFTVVA
C7D2 CD6 NIPYGSMAAISDNPTDRSLSNWRTIGATLAOTAI GVVLPLVYVY---DEAGNSVL--SGOKMMLGA
C7D2 CD8 NIPYGSMAAISDNPTDRSLSNWRTIGATLAOTAI GVVLPLVYVY---DEAGNSVL--SGOKMMLGA
C7D2 CD9 NIPYGSMAAISDNPTDRSLSNWRTIGATLAOTAI GVVLPLVYVY---DEAGNSVL--SGOKMMLGA
C7D2 CD11 NIPYGAMASAITDKPDERQSLITFRAMGAYIGEFLIGFPGPLVYIYQRIITDEGOVVIIRNNGNIFVAA
C7D2 CD12 NIPYGSMAAISDPDTRASLSTWRSVGSASLVI GTGTPLVAYT---VDGNPVL--SGSRMTIIA
C7D2 CD13 NIPYGSMAAISDNPTDRSLSNWRTIGATLAOTAI GVVLPLVYVY---DEAGNSVL--SGOKMMLGA
C7D2 CD14 NIPYGSMAAISDNPTDRSLSNWRTIGATLAOTAI GVVLPLVYVY---DEAGNSVL--SGOKMMLGA
C7D2 CD15 NIPYGSMAAISGDPDRADLSTWRTIGATLAOTAI GVVLPLVYVY---VDGKTVM--SGSRMTIIA

cons *****

C7D2 CD1 LVCSIGAVICYMLCYKMTTERVKVGN---T-QKPSFGELIKELAHNRSLIGIIVCALVFLLAOLSLSN
C7D2 CD4 GVCSLLAVCYLLCYALTTERRVRAQATAQL-EKNNLGVMLKNAVKNRALSIIIVSIFMLISOLTIOO
C7D2 CD6 LVCSIGAVICYMLCYKMTTERVKVGN---T-QKPSFGELIKELAHNRSLIGIIVCALVFLLAOLSLSN
C7D2 CD8 LVCSIGAVICYMLCYKMTTERVKVGN---T-QKPSFGELIKELAHNRSLIGIIVCALVFLLAOLSLSN
C7D2 CD9 LVCSIGAVICYMLCYKMTTERVKVGN---T-QKPSFGELIKELAHNRSLIGIIVCALVFLLAOLSLSN
C7D2 CD11 GQISLILAVCYIICYCTTERRKVPAL---SKQGVSPASGVMIIFGNAMI GILGQVCLIFQKLLTGG
C7D2 CD12 GVFSVLAVICYLLCYNLVRRVVPVAN---N-QKLDIVALKSLIINRALLGIIAALLLLAMLGMQGC
C7D2 CD13 LVCSIGAVICYMLCYKMTTERVKVGN---T-QKPSFGELIKELAHNRSLIGIIVCALVFLLAOLSLSN
C7D2 CD14 LVCSIGAVICYMLCYKMTTERVKVGN---T-QKPSFGELIKELAHNRSLIGIIVCALVFLLAOLSLSN
C7D2 CD15 GVFSICALCYIVCFKLTSERVEVPAS---N-QKISASAIKSFIFTKALLGIIIVAAIVFLLSQTLVLS

cons *****

C7D2 CD1 MNAYIYPNYFNGNIKAMSAI--SLSGTIVIL--LLSTFITKLASKIGKKELSVIGCII SAASFITLPIIHT
C7D2 CD4 MANYFVFNYYGNKAVQVSLVVMGGGM--VIAAVIAKPLAAGKAEISVVSNNVAVGVSLLYFVFRP
C7D2 CD6 MNAYIYPNYFNGNIKAMSAI--SLSGTIVIL--LLSTFITKLASKIGKKELSVIGCII SAASFITLPIIHT
C7D2 CD8 MNAYIYPNYFNGNIKAMSAI--SLSGTIVIL--LLSTFITKLASKIGKKELSVIGCII SAASFITLPIIHT
C7D2 CD9 MNAYIYPNYFNGNIKAMSAI--SLSGTIVIL--LLSTFITKLASKIGKKELSVIGCII SAASFITLPIIHT
C7D2 CD11 VNAYIYAYYFMPALSTY--NAIKLGVAL-AMATGVTLVVKKIGRRRESIVMAGLASLVFVLLFPLRI
C7D2 CD12 MSAYVFNVRSTQAGSVV--ALLSNVIAIIAICAPLASKLAKFKKELATVSCFLGAASVIVVCLILHP
C7D2 CD13 MNAYIYPNYFNGNIKAMSAI--SLSGTIVIL--LLSTFITKLASKIGKKELSVIGCII SAASFITLPIIHT
C7D2 CD14 MNAYIYPNYFNGNIKAMSAI--SLSGTIVIL--LLSTFITKLASKIGKKELSVIGCII SAASFITLPIIHT
C7D2 CD15 LAGVYVYVNYGSAQAQSTA--SLGTVVMLVVCAPPASKLSAKFGKKEAMGSSIFSALVNLVCLLWRP

cons *****

C7D2 CD1 HNVWIIWALIIIIATIGTSMFNMIWAMITDVIDESEVQNGVRQDGTIYSVYSPARKLGOACSSGLAGVL
C7D2 CD4 QNVWYVALQFLCWFLOVSEKHWALITDVIDESEIKNGIIBEDGVALYSFARKLGOALTBGLCAL
C7D2 CD6 HNVWIIWALIIIIATIGTSMFNMIWAMITDVIDESEVQNGVRQDGTIYSVYSPARKLGOACSSGLAGVL
C7D2 CD8 HNVWIIWALIIIIATIGTSMFNMIWAMITDVIDESEVQNGVRQDGTIYSVYSPARKLGOACSSGLAGVL
C7D2 CD9 HNVWIIWALIIIIATIGTSMFNMIWAMITDVIDESEVQNGVRQDGTIYSVYSPARKLGOACSSGLAGVL
C7D2 CD11 KNWYVYVALISSVGSVTFPGYTVGAIIDVIDDAEIKSGKREDGTLYIAYSFSRKGQALGSSIVGYA
C7D2 CD12 ENWYVYVYVMSVFLGFFNTIWIWAMITDVIDDAEVKNGIREDGTIYIAYSFARKLGOAFSSGMVGG
C7D2 CD13 HNVWIIWALIIIIATIGTSMFNMIWAMITDVIDESEVQNGVRQDGTIYSVYSPARKLGOACSSGLAGVL
C7D2 CD14 HNVWIIWALIIIIATIGTSMFNMIWAMITDVIDESEVQNGVRQDGTIYSVYSPARKLGOACSSGLAGVL
C7D2 CD15 ASVWGVVACYLIIANIGMFFNTIWIWAMITDVIDDAEVRNGVREDGTIYSVYSPARKLGOAFSSGLVGL

cons *****

C7D2 CD1 LSIYGYTTATAP-DPKVIDGIYNTVCLMPAAGMTLLLLLALIFLYPLNKKRVEANAALKREIRAARKEQQ
C7D2 CD4 LSMIYGYKSTAP-ESOVKEGIFDITSLVPAISFILLALILWFWYPLKLLKLVENVEFLRKHKNKTE-E
C7D2 CD6 LSIYGYTTATAP-DPKVIDGIYNTVCLMPAAGMTLLLLLALIFLYPLNKKRVEANAALKREIRAARKEQQ
C7D2 CD8 LSIYGYTTATAP-DPKVIDGIYNTVCLMPAAGMTLLLLLALIFLYPLNKKRVEANAALKREIRAARKEQQ
C7D2 CD9 LSIYGYTTATAP-DPKVIDGIYNTVCLMPAAGMTLLLLLALIFLYPLNKKRVEANAALKREIRAARKEQQ
C7D2 CD11 LSIYGYTTATAP-DPKVIDGIYNTVCLMPAAGMTLLLLLALIFLYPLNKKRVEANAALKREIRAARKEQQ

```

S7 Figure
