# Supplementary material for: Unique β-Glucuronidase Locus in Gut Microbiomes of Crohn’s Disease Patients and Unaffected First-Degree Relatives
Source: PubMed Central journal article supplement (PMC4732671; doi:10.1371/journal.pone.0148291), 2016-01-29
Supplement: pone.0148291.s009.pdf [file pone.0148291.s009.pdf]

**S1 Table. Summary of the samples and sequencing.**

| Sample name | Disease status        | Country | Sex    | Age (years) | BMI   | Total length of assembled sequence (Mb) | References                                |
|-------------|-----------------------|---------|--------|-------------|-------|-----------------------------------------|-------------------------------------------|
| In-A        | healthy               | Japan   | Male   | 45          |       | 29.93                                   | (Kurokawa, Itoh et al. 2007) <sup>1</sup> |
| In-D        | healthy               | Japan   | Male   | 35          |       | 49.55                                   |                                           |
| In-R        | healthy               | Japan   | Female | 24          |       | 46.79                                   |                                           |
| F1-S        | healthy               | Japan   | Male   | 30          |       | 38.86                                   |                                           |
| F1-T        | healthy               | Japan   | Female | 28          |       | 44.28                                   |                                           |
| F2-V        | healthy               | Japan   | Male   | 37          |       | 47.02                                   |                                           |
| F2-W        | healthy               | Japan   | Female | 36          |       | 40.97                                   |                                           |
| MH0001      | healthy               | Denmark | Female | 49          | 25.55 | 19.69                                   | (Qin, Li et al. 2010) <sup>2</sup>        |
| MH0002      | healthy               | Denmark | Female | 59          | 27.28 | 88.77                                   |                                           |
| MH0003      | healthy               | Denmark | Male   | 69          | 33.19 | 119.59                                  |                                           |
| MH0004      | healthy               | Denmark | Male   | 59          | 31.18 | 31.92                                   |                                           |
| MH0005      | healthy               | Denmark | Male   | 69          | 21.68 | 19.62                                   |                                           |
| MH0006      | healthy               | Denmark | Female | 59          | 22.38 | 217.77                                  |                                           |
| MH0007      | healthy               | Denmark | Male   | 69          | 33.60 | 32.00                                   |                                           |
| MH0008      | healthy               | Denmark | Male   | 59          | 24.35 | 37.24                                   |                                           |
| MH0009      | healthy               | Denmark | Male   | 64          | 29.04 | 112.96                                  |                                           |
| MH0010      | healthy               | Denmark | Male   | 64          | 33.27 | 36.52                                   |                                           |
| MH0011      | healthy               | Denmark | Female | 0           | 22.31 | 134.25                                  |                                           |
| MH0012      | healthy               | Denmark | Female | 42          | 32.10 | 237.58                                  |                                           |
| CD1         | patient               | Spain   | Female | 25          | 17.93 | 54.83                                   |                                           |
| CD2         | first-degree relative | Spain   | Male   | 49          | 27.76 | 12.26                                   |                                           |
| CD3         | first-degree relative | Spain   | Female | 18          | 21.51 | 74.88                                   |                                           |
| CD4         | first-degree relative | Spain   | Female | 46          | 29.69 | 100.99                                  |                                           |
| CD6         | patient               | Spain   | Female | 36          | 18.52 | 76.79                                   |                                           |
| CD8         | first-degree relative | Spain   | Male   | 51          | 29.38 | 116.87                                  |                                           |
| CD9         | first-degree relative | Spain   | Female | 48          | 27.55 | 99.57                                   |                                           |
| CD11        | first-degree relative | Spain   | Female | 62          | 35.46 | 83.58                                   |                                           |
| CD12        | patient               | Spain   | Female | 41          | 20.20 | 59.20                                   |                                           |
| CD13        | first-degree relative | Spain   | Male   | 68          | 25.69 | 99.94                                   |                                           |
| CD14        | first-degree relative | Spain   | Female | 41          | 23.12 | 116.12                                  |                                           |
| CD15        | patient               | Spain   | Female | 34          | 19.00 | 56.10                                   |                                           |
| UC6         | healthy               | Spain   | Female | 38          | 23.18 | 125.25                                  |                                           |
| UC7         | healthy               | Spain   | Female | 19          | 23.05 | 56.97                                   |                                           |
| UC8         | healthy               | Spain   | Male   | 22          | 25.40 | 121.81                                  |                                           |
| UC9         | healthy               | Spain   | Male   | 32          | 30.37 | 99.85                                   |                                           |
| UC18        | healthy               | Spain   | Female | 63          | 28.67 | 94.28                                   |                                           |
| UC19        | healthy               | Spain   | Female | 37          | 21.19 | 113.78                                  |                                           |
