# Supplementary material for: Unique β-Glucuronidase Locus in Gut Microbiomes of Crohn’s Disease Patients and Unaffected First-Degree Relatives
Source: PubMed Central journal article supplement (PMC4732671; doi:10.1371/journal.pone.0148291), 2016-01-29
Supplement: pone.0148291.s010.pdf [file pone.0148291.s010.pdf]

**S2 Table. Best tBlastn results for H11G11- and C7D2- transporters in microbiomes of CD patients, first degree relatives and healthy subjects.**

| Microbiome source                  | Database disease status | Template H11G11 (healthy) C7D2 (CD) | C7D2 (CD) homology (identity%) | H11G11 (Healthy) homology (identity%) | Best Blastp result with identified strain (identity%)                                                                          | Name given (template-microbiome) |
|------------------------------------|-------------------------|-------------------------------------|--------------------------------|---------------------------------------|--------------------------------------------------------------------------------------------------------------------------------|----------------------------------|
| F1-S                               | Healthy                 | H11G11<br>C7D2                      | 27<br>52                       | 33<br>30                              | <i>gi160943280 Faecalibacterium prausnitzii M21/2 (99%)</i><br><i>gi238874027 Eubacterium eligens ATCC 27750 plasmid (90%)</i> | H11G11 F1S<br>C7D2 F1S           |
| F2-V                               | Healthy                 | C7D2                                | 30                             | 29                                    | <i>gi182624781 Clostridium perfringens D str. JGS1721 (42%)</i>                                                                | C7D2 F2V                         |
| F2-W                               | Healthy                 | H11G11/C7D2                         | 30                             | 100                                   | <i>gi154505099 Ruminococcus gnavus ATCC 29149 (44%)</i>                                                                        | H11G11/C7D2 F2W                  |
| In-D                               | Healthy                 | H11G11 /C7D2                        | 23                             | 23                                    | <i>gi189459801 Bacteroides coprocola DSM 17136 (99%)</i>                                                                       | C7D2/H11G11 InD                  |
| In-R                               | Healthy                 | H11G11                              | 27                             | 34                                    | <i>gi 291534767 Roseburia intestinalis M50/1 (99%)</i>                                                                         | H11G11 InR                       |
| MH0001                             | Healthy                 | H11G11 /C7D2                        | 25                             | 25                                    | <i>gi153813566 Ruminococcus obeum ATCC 29174 (73%)</i>                                                                         | H11G11/C7D2 MH1                  |
| MH0002                             | Healthy                 | H11G11                              | 21                             | 25                                    | <i>gi269959236 Vibrio harveyi 1DA3 (31%)</i>                                                                                   | H11G11 MH2                       |
| MH0003                             | Healthy                 | H11G11                              | 26                             | 87                                    | <i>gi154505099 Ruminococcus gnavus ATCC 29149 (44%)</i>                                                                        | H11G11 MH3                       |
| MH0004                             | Healthy                 | H11G11                              | 26                             | 27                                    | <i>gi291524604 Eubacterium rectale DSM 17629 (100%)</i>                                                                        | H11G11 MH4                       |
| MH0005                             | Healthy                 | H11G11/ C7D2                        | 24                             | 25                                    | <i>gi153813566 Ruminococcus obeum ATCC 29174 (72%)</i>                                                                         | H11G11/C7D2 MH5                  |
| MH0006                             | Healthy                 | H11G11<br>C7D2                      | 26<br>70                       | 87<br>29                              | <i>gi154505099 Ruminococcus gnavus ATCC 29149 (44%)</i><br><i>gi257438598 Faecalibacterium prausnitzii A2-165 (99%)</i>        | H11G11 MH6<br>C7D2 MH6           |
| MH0007                             | Healthy                 | H11G11 /C7D2                        | 27                             | 33                                    | <i>gi 291534767 Roseburia intestinalis M50/1 (99%)</i>                                                                         | C7D2/ H11G11 MH7                 |
| MH0008                             | Healthy                 | H11G11 /C7D2                        | 32                             | 46                                    | <i>gi260589235 Blautia hansenii DSM 20583 (58%)</i>                                                                            | H11G11 /C7D2 MH8                 |
| MH0009                             | Healthy                 | H11G11 /C7D2                        | 28                             | 100                                   | <i>gi154505099 Ruminococcus gnavus ATCC 29149 (45%)</i>                                                                        | H11G11/C7D2 MH9                  |
| MH0010                             | Healthy                 | C7D2                                | 33                             | 29                                    | <i>gi257413542 Roseburia intestinalis L1-82 (100%)</i>                                                                         | C7D2/H11G11 MH10                 |
| MH0011                             | Healthy                 | C7D2                                | 69                             | 29                                    | <i>gi257438598 Faecalibacterium prausnitzii A2-165 (99%)</i>                                                                   | C7D2 MH11                        |
| MH0012                             | Healthy                 | H11G11<br>C7D2                      | 28<br>52                       | 100<br>29                             | <i>gi154505099 Ruminococcus gnavus ATCC 29149 (44%)</i><br><i>gi238874027 Eubacterium eligens ATCC 27750 plasmid (99%)</i>     | H11G11 MH12<br>C7D2 MH12         |
| <u>V1-UC6</u>                      | Healthy                 | H11G11/ C7D2                        | 45                             | 30                                    | <i>gi347533214 Roseburia hominis A2-183 (100%)</i>                                                                             | C7D2 /H11G11 UC6                 |
| <u>V1-UC7</u>                      | Healthy                 | H11G11/ C7D2                        | 27                             | 29                                    | <i>gi494990662 Clostridium asparagiforme (85%)</i>                                                                             | H11G11/ C7D2 UC7                 |
| <u>V1-UC8</u>                      | Healthy                 | H11G11/ C7D2                        | 28                             | 99                                    | <i>gi547236978 Eubacterium sp. CAG:180 (99%)</i>                                                                               | H11G11/ C7D2 UC8                 |
| <u>V1-UC9</u>                      | Healthy                 | H11G11/ C7D2                        | 45                             | 30                                    | <i>gi548310806 Roseburia hominis A2-183 (58%)</i>                                                                              | C7D2 /H11G11 UC9                 |
| <u>V1-UC18</u>                     | Healthy                 | H11G11<br>C7D2                      | 27<br>30                       | 26<br>22                              | <i>gi547465828 Roseburia sp. CAG:197 (95%)</i><br><i>gi479208413 Faecalibacterium prausnitzii L2-6 (98%)</i>                   | H11G11 UC18<br>C7D2 UC18         |
| <u>V1-UC19</u>                     | Healthy                 | H11G11/ C7D2                        | 29                             | 28                                    | <i>gi479149068 Roseburia intestinalis XB6B4 (100%)</i>                                                                         | C7D2/H11G11 UC19                 |
| <u>V1-CD13</u>                     | CD-FR                   | C7D2                                | 52                             | 29                                    | <i>gi238874027 Eubacterium eligens ATCC 27750 plasmid (99%)</i>                                                                | C7D2 CD13                        |
| <u>V1-CD-2</u>                     | CD-FR                   | C7D2                                | 48*                            | 34*                                   |                                                                                                                                |                                  |
| <u>V1-CD-3</u>                     | CD-FR                   | H11G11                              | 27                             | 36                                    | <i>gi154505099 Ruminococcus gnavus ATCC 29149 (42%)</i>                                                                        | H11G11 CD3                       |
| <u>V1-CD-4</u>                     | CD-FR                   | C7D2                                | 48                             | 33                                    | <i>gi261366220 Subdoligranulum variabile DSM 15176 (66%)</i>                                                                   | C7D2/H11G11 CD4                  |
| <u>V1-CD-8</u>                     | CD-FR                   | H11G11<br>C7D2                      | 26<br>52                       | 87<br>30                              | <i>gi154505099 Ruminococcus gnavus ATCC 29149 (44%)</i><br><i>gi238874027 Eubacterium eligens ATCC 27750 plasmid (99%)</i>     | H11G11 CD8<br>C7D2 CD8           |
| <u>V1-CD-9</u>                     | CD-FR                   | C7D2                                | 53                             | 30                                    | <i>gi238874027 Eubacterium eligens ATCC 27750 plasmid (99%)</i>                                                                | C7D2 CD9                         |
| <u>V1-CD-11</u>                    | CD-FR                   | C7D2                                | 37                             | 29                                    | <i>gi237737733 Fusobacterium mortiferum ATCC 9817 (100%)</i>                                                                   | C7D2 CD11                        |
| <u>V1-CD-14</u>                    | CD-FR                   | C7D2                                | 52                             | 30                                    | <i>gi238874027 Eubacterium eligens ATCC 27750 plasmid (99%)</i>                                                                | C7D2 CD14                        |
| <u>V1-CD-1</u>                     | CD                      | H11G11<br>C7D2                      | 27<br>52                       | 33<br>29                              | <i>gi160943280 Faecalibacterium prausnitzii M21/2 (99%)</i><br><i>gi238874027 Eubacterium eligens ATCC 27750 plasmid (99%)</i> | H11G11 CD1<br>C7D2 CD1           |
| <u>V1-CD-6</u>                     | CD                      | C7D2                                | 52                             | 30                                    | <i>gi238874027 Eubacterium eligens ATCC 27750 plasmid (99%)</i>                                                                | C7D2 CD6                         |
| <u>V1-CD-12</u>                    | CD                      | H11G11<br>C7D2                      | 28<br>92                       | 31<br>31                              | <i>gi 291534591 Roseburia intestinalis M50/1 (80%)</i><br><i>gi154503147 Ruminococcus gnavus ATCC 29149 (83%)</i>              | H11G11 CD12<br>C7D2 CD12         |
| <u>V1-CD-15</u>                    | CD                      | C7D2                                | 63                             | 31                                    | <i>gi257438598 Faecalibacterium prausnitzii A2-165 (75%)</i>                                                                   | C7D2 CD15                        |
| <b>Template H11G11-transporter</b> |                         |                                     | <b>29</b>                      | <b>100</b>                            | <i>gi154505099 Ruminococcus gnavus ATCC 29149 (44%)</i>                                                                        |                                  |
| <b>Template C7D2-transporter</b>   |                         |                                     | <b>100</b>                     | <b>29</b>                             | <i>gi154505099 Ruminococcus gnavus ATCC 29149 (83%)</i>                                                                        |                                  |

Spanish subjects are underlined. They include both CD-related families and healthy subjects (CD-unrelated). \*: truncated sequences (<150 amino acids).
