# Supplementary material for: Unique β-Glucuronidase Locus in Gut Microbiomes of Crohn’s Disease Patients and Unaffected First-Degree Relatives
Source: PubMed Central journal article supplement (PMC4732671; doi:10.1371/journal.pone.0148291), 2016-01-29
Supplement: pone.0148291.s011.pdf [file pone.0148291.s011.pdf]

**S3 Table. Coverage and identity of amino acid AFTR sequences associated to C7D2-transporter in published genomes**

| Strains                                    | homology with AFTR from <i>E. eligens</i> plasmid |               |
|--------------------------------------------|---------------------------------------------------|---------------|
|                                            | Coverage (%)                                      | Identity (%)* |
| <i>Clostridium hathewayi</i> DSM 13479     | 99                                                | 37            |
| <i>Faecalibacterium prausnitzii</i> L2-6   | 96                                                | 30            |
| <i>Faecalibacterium prausnitzii</i> A2-165 | 96                                                | 31            |
| <i>Ruminococcus gnavus</i> ATCC 29149      | 99                                                | 40            |
| <i>Shuttleworthia satelles</i> DSM 14600   | 98                                                | 40            |
| <i>Subdoligranulum variabile</i> DSM 15176 | 84                                                | 35            |
| <i>Roseburia hominis</i> A2-183            | 83                                                | 38            |
| <i>Carnobacterium</i> sp. AT7              | 80                                                | 32            |
| <i>Clostridium bartlettii</i> DSM 16795    | 76                                                | 31            |
| <i>Roseburia intestinalis</i> L1-82        | 58                                                | 25            |
| <i>Clostridium asparagiforme</i> DSM 15981 | 57                                                | 33            |
| <i>Clostridium cellulolyticum</i> H10      | 52                                                | 37            |

\*: determined from homologous region from the blastp result.
